# Supplementary material for: Environmentally dependent dust chemistry of a super Asian dust storm in March 2010: observation and simulation
Source: Copernicus journal article supplement (doi:10.5194/acp-18-3505-2018), 2018-03-09
Supplement: Supplementary file 1 [file acp-18-3505-2018-supplement.pdf]

Supplement of Atmos. Chem. Phys., 18, 3505–3521, 2018  
<https://doi.org/10.5194/acp-18-3505-2018-supplement>  
© Author(s) 2018. This work is distributed under  
the Creative Commons Attribution 3.0 License.

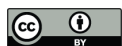

Atmospheric  
Chemistry  
and Physics  
Open Access  
EGU

*Supplement of*

## **Environmentally dependent dust chemistry of a super Asian dust storm in March 2010: observation and simulation**

**Qiongzhen Wang et al.**

*Correspondence to:* Kan Huang ([huangkan@fudan.edu.cn](mailto:huangkan@fudan.edu.cn)) and Guoshun Zhuang ([gzhuang@fudan.edu.cn](mailto:gzhuang@fudan.edu.cn))

The copyright of individual parts of the supplement might differ from the CC BY 3.0 License.

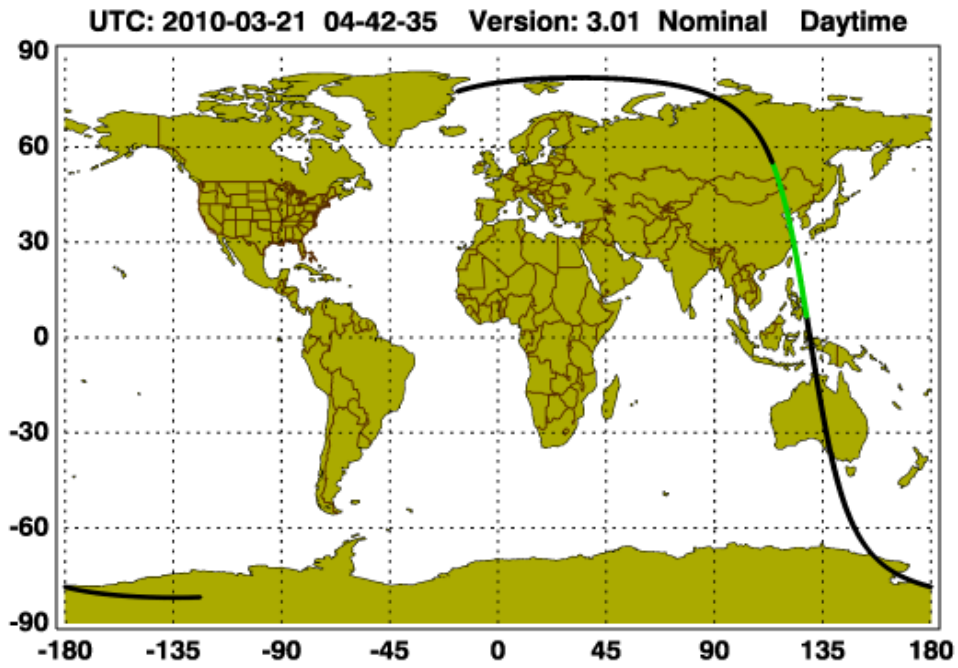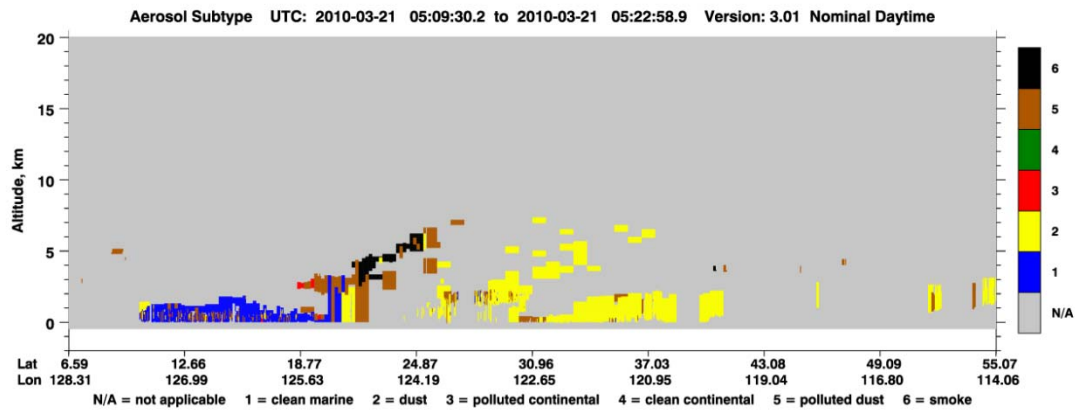

Fig. S1 CALIOP Lidar transects and the orbit tracks across the sampling region and adjacent areas on March 21, 2010.

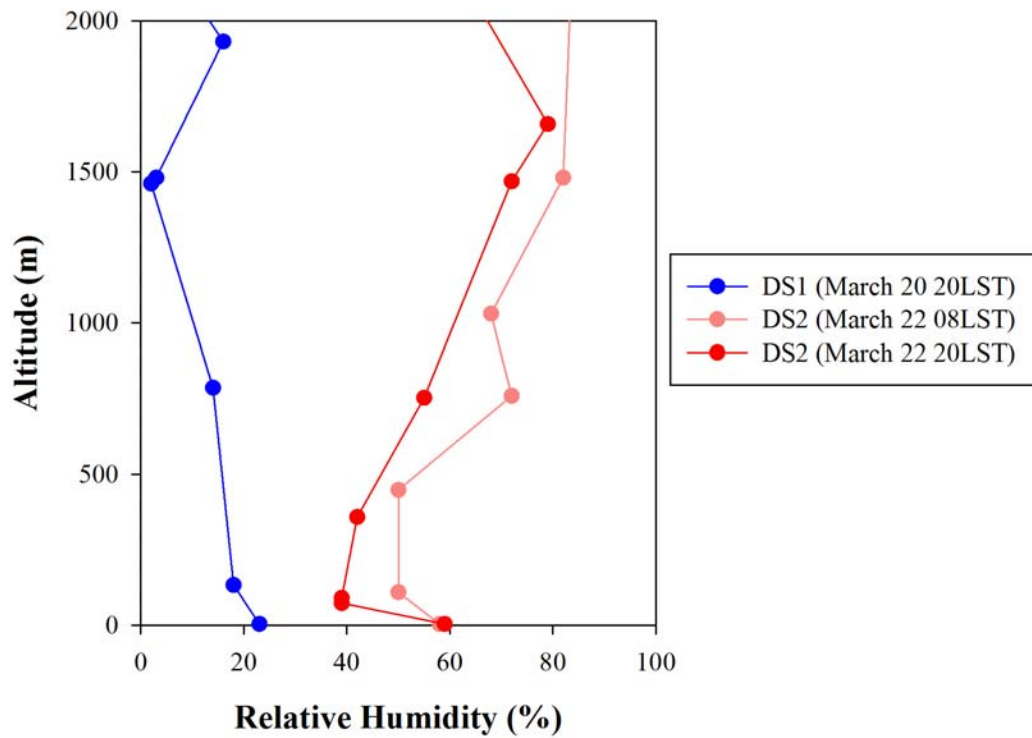

Fig. S2 Vertical profiles of relative humidity (RH) from sounding measurements at the Baoshan meteorology station in Shanghai

Table S1. The API grading limited value and the corresponding concentrations of air pollutants in China (Ministry of Environmental Protection of the People's Republic of China, Technical requirements for urban ambient air quality daily report and forecast, 2008, [http://www.zhb.gov.cn/gkml/hbb/bgth/200910/t20091022\\_174917.htm](http://www.zhb.gov.cn/gkml/hbb/bgth/200910/t20091022_174917.htm)).

| API | Concentration ( $\mu\text{g}/\text{m}^3$ ) * |                 |                  |        |                |
|-----|----------------------------------------------|-----------------|------------------|--------|----------------|
|     | SO <sub>2</sub>                              | NO <sub>2</sub> | PM <sub>10</sub> | CO     | O <sub>3</sub> |
| 50  | 50                                           | 80              | 50               | 5000   | 120            |
| 100 | 150                                          | 120             | 150              | 10000  | 200            |
| 200 | 800                                          | 280             | 350              | 60000  | 400            |
| 300 | 1600                                         | 565             | 420              | 90000  | 800            |
| 400 | 2100                                         | 750             | 500              | 120000 | 1000           |
| 500 | 2620                                         | 940             | 600              | 150000 | 1200           |

\*24h average concentrations for SO<sub>2</sub>, NO<sub>2</sub>, PM<sub>10</sub>, and CO and 8h average concentrations for O<sub>3</sub>
